# Supplementary material
Source: PubMed Central journal article supplement (PMC3393593)
Supplement: supp_86.12.6643_TableS1-S3.pdf [file supp_86.12.6643_TableS1-S3.pdf]

# Supplemental materials

## **Distinct effects of two HIV-1 capsid assembly inhibitor families that bind the same site within the N-terminal domain of the viral CA protein**

Christopher T. Lemke<sup>1#</sup>, Steve Titolo<sup>2</sup>, Uta von Schwedler<sup>3</sup>, Nathalie Goudreau<sup>1</sup>, Jean-François Mercier<sup>2</sup>, Elizabeth Wardrop<sup>2</sup>, Anne-Marie Faucher<sup>1</sup>, René Coulombe<sup>1</sup>, Soma S.R. Banik<sup>2</sup>, Lee Fader<sup>1</sup>, Alexandre Gagnon<sup>1+</sup>, Stephen H. Kawai<sup>1</sup>, Jean Rancourt<sup>1</sup>, Martin Tremblay<sup>1</sup>, Christiane Yoakim<sup>1</sup>, Bruno Simoneau<sup>1</sup>, Jacques Archambault<sup>2</sup>, Wesley I. Sundquist<sup>3</sup>, Stephen W. Mason<sup>2#</sup>

Boehringer Ingelheim (Canada) Ltd., Research & Development, Laval, Québec, Canada: <sup>1</sup>Department of Chemistry;

<sup>2</sup>Department of Biological Sciences;

and

<sup>3</sup>Department of Biochemistry, University of Utah, Salt Lake City, Utah 84132 USA

#Co-corresponding authors:

C.L.: [christopher.lemke@boehringer-ingenheim.com](mailto:christopher.lemke@boehringer-ingenheim.com);

S.W.M.: [Stephen.mason@bms.com](mailto:Stephen.mason@bms.com)

**Table S1**

Amino acid substitutions selected by culture of virus in the presence of various inhibitors

| <b>Compound</b> | <b>EC<sub>50</sub> / CC<sub>50</sub><br/>(<math>\mu</math>M)</b> | <b>Major<br/>substitutions*</b> | <b>Minor<br/>substitutions*<br/>*</b> |
|-----------------|------------------------------------------------------------------|---------------------------------|---------------------------------------|
| BD 2            | 1.1 / >84                                                        | <b>G61E</b>                     | -                                     |
| BD 1            | 0.07 / >28                                                       | <b>V36T, G208R</b>              | V27A/I, A31D,<br>T58I, L138P          |
| BM 2            | 0.26 / >25                                                       | <b>T58I</b>                     | K30R, S33G,<br>M144V, G208R,<br>E213G |
| BM 3            | 0.11 / 14                                                        | <b>T58I, G208R</b>              | V27A, K30R,<br>A31T, M68I,<br>M144I/V |

\*Major substitutions are those observed in at least 40% of sequenced clones.

\*\*Size and boldness of font indicates relative frequency of mutation found in clonal analysis (includes substitutions observed only once and in any passage).

**Table S2** Reductions in affinities for additional BM compounds by resistance substitutions

| BM Cmps \ $K_D$ ( $\mu$ M) | BM <sup>r</sup> |              |              |            | BD <sup>r</sup> |           |
|----------------------------|-----------------|--------------|--------------|------------|-----------------|-----------|
|                            | WT              | T58I         | K30R         | S33G       | V27A            | V36T      |
| BM 2                       | 0,21            | 0,19 (0.9x)  | ND           | 2,7 (13x)  | 1,2 (6x)        | 3,3 (16x) |
| BM 6                       | 0,057           | 0,078 (1.4x) | 0,080 (1,4x) | 0,98 (17x) | 0,55 (10x)      | 1,2 (21x) |
| BM 7                       | 0,18            | 0,24 (1.4x)  | 0,14 (0,8x)  | 2,9 (17x)  | 1,8 (10x)       | 2,7 (15x) |
| BM 5                       | 0,17            | 0,18 (1.1x)  | 0,15 (0,9x)  | 2,2 (14x)  | 1,2 (10x)       | 3,0 (18x) |

No effect on affinity

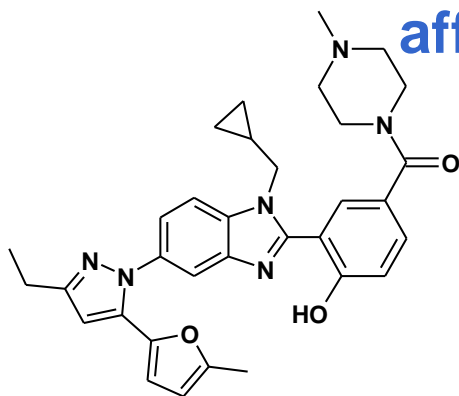

BM 6

Significant effect on affinity

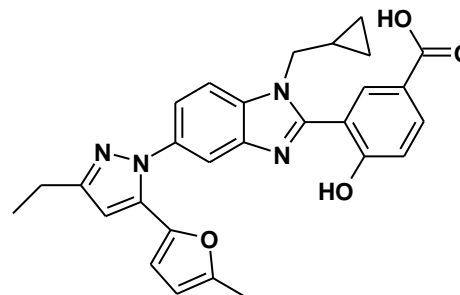

BM 7

**Table S3** Energetics of BM2 binding to wildtype and mutant CA<sub>NTD</sub>

| <b>BM 2</b> | <b>K<sub>D</sub></b><br><i>(<math>\mu</math>M)</i> | <b><math>\Delta</math>G</b><br><i>(kcal/mole)</i> | <b><math>\Delta</math>H</b><br><i>(kcal/mole)</i> | <b>-T<math>\Delta</math>S</b><br><i>(kcal/mole)</i> |
|-------------|----------------------------------------------------|---------------------------------------------------|---------------------------------------------------|-----------------------------------------------------|
| WT          | 0.210                                              | -9.12                                             | -18.3                                             | 9.21                                                |
| T58I        | 0.191                                              | -9.17                                             | -18.0                                             | 8.84                                                |
| V27A        | 1.20                                               | -8.08                                             | -15.3                                             | 7.21                                                |
| S33G        | 2.74                                               | -7.59                                             | -15.2                                             | 7.57                                                |
| V36T        | 3.29                                               | -7.48                                             | -15.6                                             | 8.13                                                |
